# Supplementary material for: Electrospun PCL/Gel-aligned scaffolds enhance the biomechanical strength in tendon repair
Source: Royal Society of Chemistry journal article supplement (doi:10.1039/c9tb00837c), 2019-01-01
Supplement: c9tb00837c1.pdf [file c9tb00837c1.pdf]

### Supplementary Information

Title: Electrospun PCL/Gel aligned scaffolds enhance the biomechanical strength in tendon repair

Dandan Sheng,<sup>‡a</sup> Jinxiu Li,<sup>‡b</sup> Chengchong Ai,<sup>a</sup> Ting Ying,<sup>b</sup> Xingwang Liu,<sup>a</sup> Jiangyu Cai,<sup>a</sup>  
Xiaoquan Ding,<sup>a</sup> Wenhe Jin,<sup>a</sup> He Xu,<sup>‡b</sup> Jun Chen,<sup>\*a</sup> and Shiyi Chen<sup>\*a</sup>

a. Department of Sports Medicine, Huashan Hospital, Fudan University, 12 Middle Wulumuqi Road, Shanghai, 200040, People's Republic of China. Fax: +86 21 6249 6020; Tel: +86 21 5288 8255

b. College of Chemistry and Materials Sciences, Shanghai Normal University, 100 Guilin Road, Shanghai, 200234, People's Republic of China.

\* Corresponding author: Email: xuhe@shnu.edu.cn; biochenjun@fudan.edu.cn; cshiyi@163.com;

‡ These authors contributed equally.

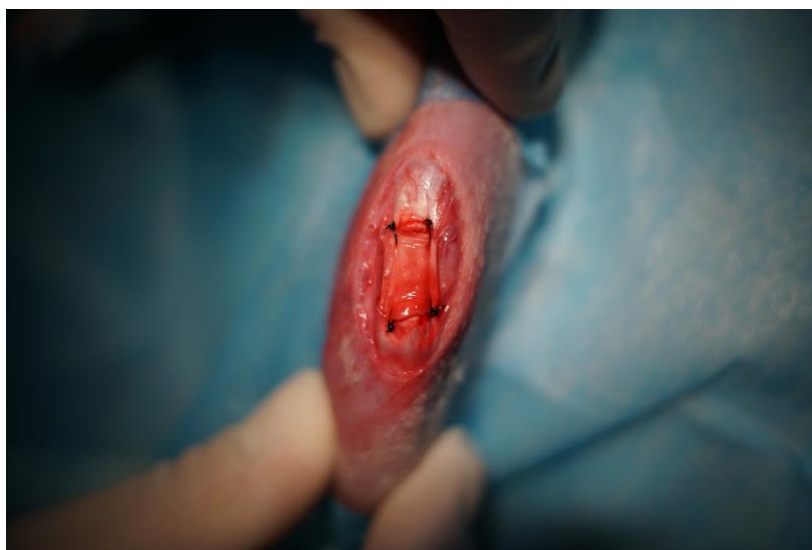

Fig. S1 The fixation of the electrospun scaffold in animal experiment.

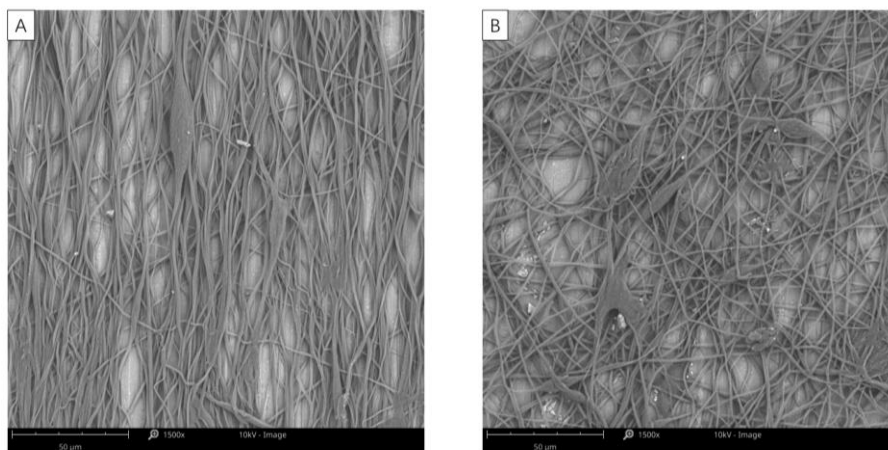

Fig. S2 The orientation of fibroblast L929 cells on the PCL/Gel aligned scaffolds (P/G-A) (A) and PCL/Gel random scaffolds (P/G-R) (B) after 1 day cultivation.

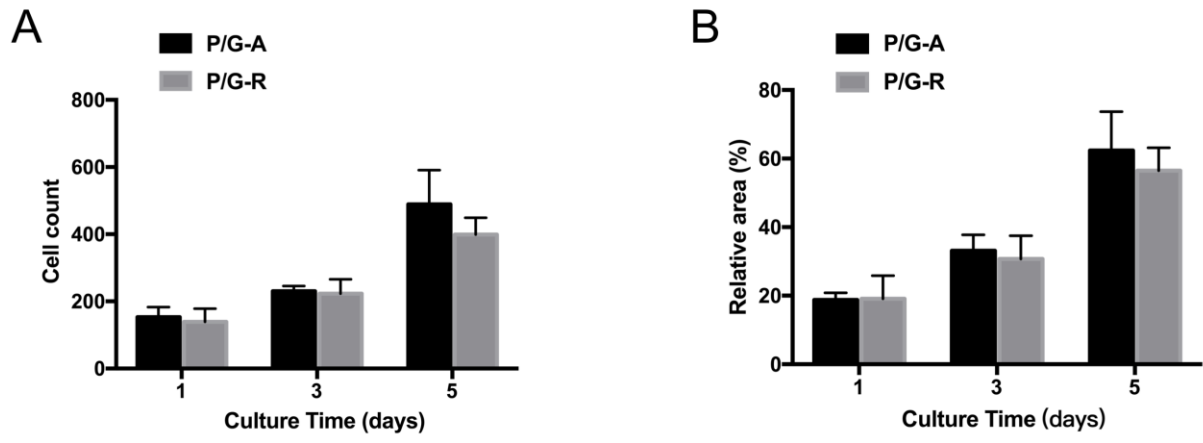

Fig. S3 The cell count (A) and relative area (B) of fibroblast L929 cells in P/G-A and P/G-R after 1, 3, and 5 days cultivation.
